# Supplementary material for: Microarray Comparative Genomic Hybridisation Analysis Incorporating Genomic Organisation, and Application to Enterobacterial Plant Pathogens
Source: PLOS journal article supplement (doi:10.1371/journal.pcbi.1000473), 2009-08-20
Supplement: S8 (10.1371/journal.pcbi.1000473.s008) [file journal.pcbi.1000473.s008]

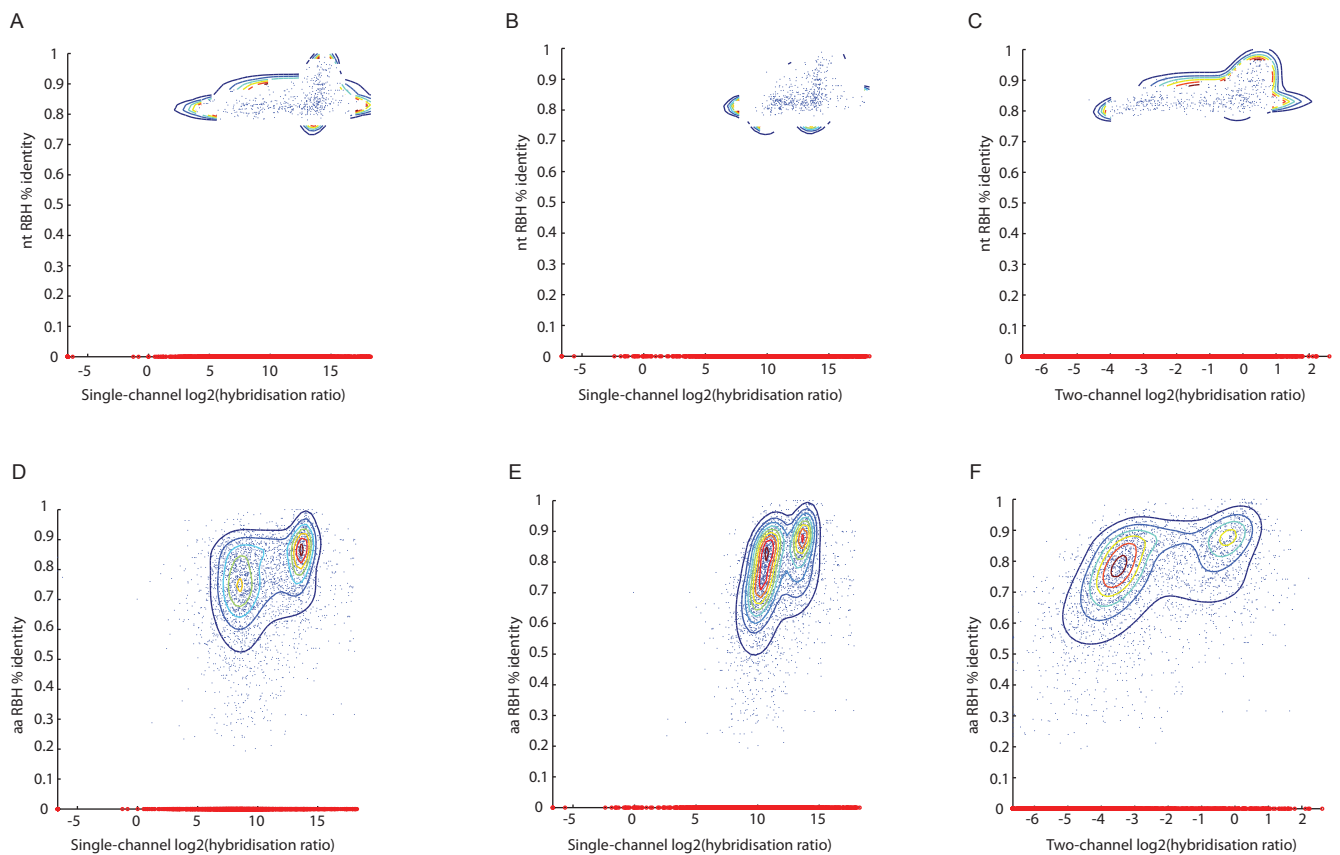

Supplementary Figure 2: Scatterplots of putative orthologue (RBH) nucleotide sequence identity against log-transformed hybridisation scores for *Dda3937* gDNA with A) no reference gDNA; B) *Pba1043* reference gDNA; and C) log-transformed hybridization ratio with *Pba1043* reference gDNA, and of protein sequence identity against log-transformed hybridisation scores for *Dda3937* gDNA with D) no reference gDNA; E) *Pba1043* reference gDNA; and F) log-transformed hybridisation ratio with *Pba1043* reference gDNA. Probes to *Pba1043* sequences with no *Dda3937* orthologue are indicated in red. In all cases, it is not possible to distinguish between 'present' and 'divergent' orthologues on the basis of hybridisation score or ratio, and probes to sequences with no orthologue span a range of hybridisation scores from extremely weak to very strong.
