# Supplementary material for: Microarray Comparative Genomic Hybridisation Analysis Incorporating Genomic Organisation, and Application to Enterobacterial Plant Pathogens
Source: PLOS journal article supplement (doi:10.1371/journal.pcbi.1000473), 2009-08-20
Supplement: S9 (10.1371/journal.pcbi.1000473.s009) [file journal.pcbi.1000473.s009]

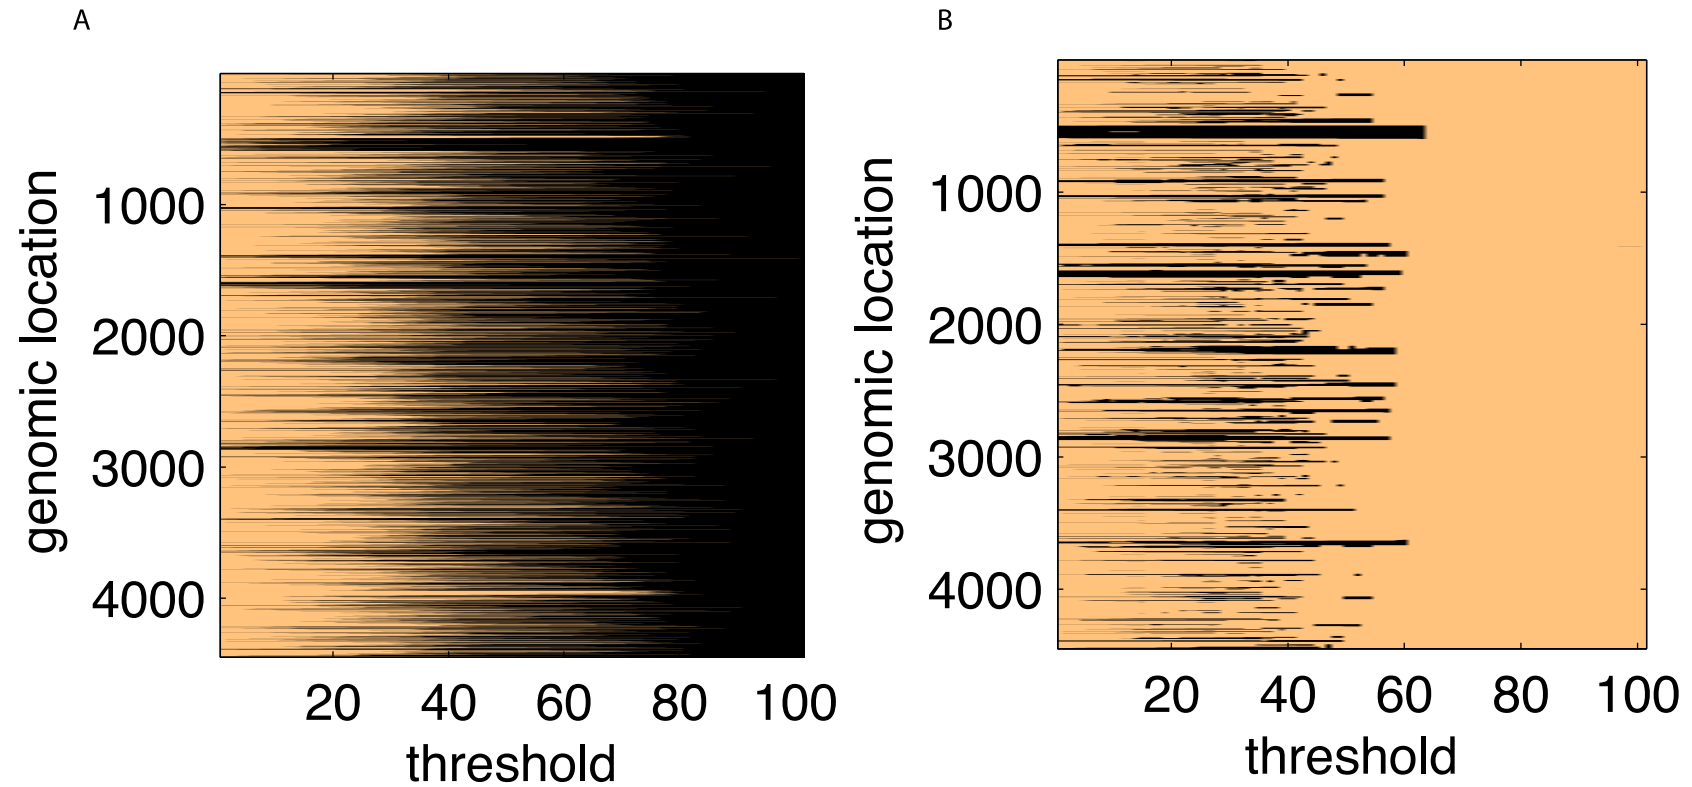

Supplementary Figure 3: Plot of the predictions of the threshold (A) and HMM (B) methods as the threshold is varied from the lowest to highest threshold value in the aCGH experiment with *Dda3937* against a *Pba1043* gDNA reference, taking log-transformed hybridisation ratios. Both methods predict a mixture of CDS with and without orthologues at the lowest threshold value. As the threshold increases from a minimum to a maximum, the proportion of CDS predicted to have no orthologue increases to 100% for the threshold method. At large threshold values, the HMM uniformly predicts the dominant state of the training data, which in this case is that all *Pba1043* CDS have an orthologue in *Dda3937*.
